# Supplementary material for: Using statistical models to depict the response of multi-timescale drought to forest cover change across climate zones
Source: Copernicus journal article supplement (doi:10.5194/hess-28-321-2024), 2024-01-19
Supplement: Supplementary file 1 [file hess-28-321-2024-supplement.pdf]

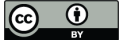

*Supplement of*

## **Using statistical models to depict the response of multi-timescale drought to forest cover change across climate zones**

**Yan Li et al.**

*Correspondence to:* Yan Li ([yan.li@met.fu-berlin.de](mailto:yan.li@met.fu-berlin.de))

The copyright of individual parts of the supplement might differ from the article licence.

## 1 Data

**Table S1.** Datasets needed in the study

| Variables              | Spatial resolution | Download link                                                                                                                                                                       | Citation                          | DOI data/article                                                                                    | Last accessed |
|------------------------|--------------------|-------------------------------------------------------------------------------------------------------------------------------------------------------------------------------------|-----------------------------------|-----------------------------------------------------------------------------------------------------|---------------|
| Climate classification | 0.1 °x0.1°         | <a href="https://hess.copernicus.org/articles/11/1633/2007/hess-11-1633-2007-supplement.zip">https://hess.copernicus.org/articles/11/1633/2007/hess-11-1633-2007-supplement.zip</a> | Peel et al. (2007)                | <a href="https://doi.org/10.5194/hess-11-1633-2007">https://doi.org/10.5194/hess-11-1633-2007</a>   | Feb 2018      |
| SPEI                   | 0.5°x0.5°          | <a href="http://sac.csic.es/spei">http://sac.csic.es/spei</a>                                                                                                                       | Vicente-Serrano et al. (2010a, b) | <a href="https://doi.org/10.20350/digitalCSIC/15555">https://doi.org/10.20350/digitalCSIC/15555</a> | March 2020    |
| scPDSI                 | 0.5°x0.5°          | <a href="https://crudata.uea.ac.uk/cru/data/drought/">https://crudata.uea.ac.uk/cru/data/drought/</a>                                                                               | Barichivich et al. (2021)         | <a href="https://doi.org/10.1175/BAMS-D-21-0098.1">https://doi.org/10.1175/BAMS-D-21-0098.1</a>     | March 2021    |
| CCI land cover dataset | 300 m              | <a href="http://maps.elie.ucl.ac.be/CCI/viewer/download.php">http://maps.elie.ucl.ac.be/CCI/viewer/download.php</a>                                                                 | ESA (2017)                        |                                                                                                     | June 2021     |
| Precipitation          | 0.5°x0.5°          | <a href="https://crudata.uea.ac.uk/cru/data/hrg/">https://crudata.uea.ac.uk/cru/data/hrg/</a>                                                                                       | (Harris et al., 2020)             | <a href="https://doi.org/10.1038/s41597-020-0453-3">https://doi.org/10.1038/s41597-020-0453-3</a>   | March 2021    |
| Temperature            | 0.5°x0.5°          | <a href="https://crudata.uea.ac.uk/cru/data/hrg/">https://crudata.uea.ac.uk/cru/data/hrg/</a>                                                                                       | (Harris et al., 2020)             | <a href="https://doi.org/10.1038/s41597-020-0453-3">https://doi.org/10.1038/s41597-020-0453-3</a>   | March 2021    |

**Table S2.** The classification of SPEI values

| SPEI values    | Drought classification |
|----------------|------------------------|
| 2.00 and above | Extremely wet          |
| 1.50 to 1.99   | Very wet               |
| 1.00 to 1.49   | Moderately wet         |
| -0.99 to 0.99  | Near normal            |
| -1.49 to -1.00 | Moderately dry         |
| -1.99 to -1.50 | Very dry               |
| -2.00 and less | Extremely dry          |

**Table S3.** The classification of scPDSI values

| scPDSI values  | Drought classification |
|----------------|------------------------|
| 4.00 and above | Extremely wet          |
| 3.00 to 3.99   | severely wet           |
| 2.00 to 2.99   | Moderately wet         |
| 1.00 to 1.99   | Mildly wet             |
| 0.50 to 0.99   | Incipiently wet        |
| -0.49 to 0.49  | Near normal            |
| -0.99 to -0.50 | Incipiently dry        |
| -1.99 to -1.00 | Mildly dry             |
| -2.99 to -2.00 | Moderately dry         |
| -3.99 to -3.00 | severely dry           |
| -4.00 and less | Extremely dry          |

## 2 Methods

**Table S4.** Significance from two-sided  $t$ -tests for coefficients being compatible with 0 in the linear models across different climate zones (equatorial, arid, temperate, snow) and for the scPDSI and SPEI $\tau$  with different integration times. (level of significance '\*\*\*' 0.001, '\*\*' 0.01, '\*' 0.05, '.' 0.1)

|            |        | $X_{\text{forest}}$ | $X_{\text{precip}}$ | $X_{\text{temp}}$ | $X_{\text{forest}} : X_{\text{precip}}$ | $X_{\text{forest}} : X_{\text{temp}}$ | $X_{\text{precip}} : X_{\text{temp}}$ |
|------------|--------|---------------------|---------------------|-------------------|-----------------------------------------|---------------------------------------|---------------------------------------|
| Equatorial | scPDSI |                     | ***                 | ***               |                                         |                                       |                                       |
|            | SPEI03 |                     | ***                 | ***               |                                         |                                       |                                       |
|            | SPEI06 |                     | ***                 | ***               |                                         |                                       |                                       |
|            | SPEI12 |                     | ***                 | *                 |                                         |                                       |                                       |
|            | SPEI24 |                     | ***                 | *                 |                                         |                                       |                                       |
| Arid       | scPDSI | **                  | ***                 |                   |                                         |                                       |                                       |
|            | SPEI03 |                     | **                  | **                |                                         | *                                     |                                       |
|            | SPEI06 |                     | **                  | **                |                                         | *                                     |                                       |
|            | SPEI12 |                     | ***                 | ***               | *                                       |                                       | **                                    |
|            | SPEI24 |                     | **                  | **                | *                                       |                                       | **                                    |
| Temperate  | scPDSI | *                   | ***                 | *                 | .                                       | *                                     | *                                     |
|            | SPEI03 |                     | ***                 | **                |                                         |                                       |                                       |
|            | SPEI06 |                     | ***                 | ***               |                                         |                                       |                                       |
|            | SPEI12 |                     | ***                 | ***               |                                         |                                       |                                       |
|            | SPEI24 |                     | ***                 | ***               |                                         |                                       |                                       |
| Snow       | scPDSI |                     | *                   |                   |                                         |                                       |                                       |
|            | SPEI03 |                     | **                  |                   |                                         |                                       |                                       |
|            | SPEI06 |                     | ***                 |                   |                                         |                                       |                                       |
|            | SPEI12 |                     |                     | **                |                                         |                                       |                                       |
|            | SPEI24 |                     | *                   | *                 |                                         |                                       |                                       |

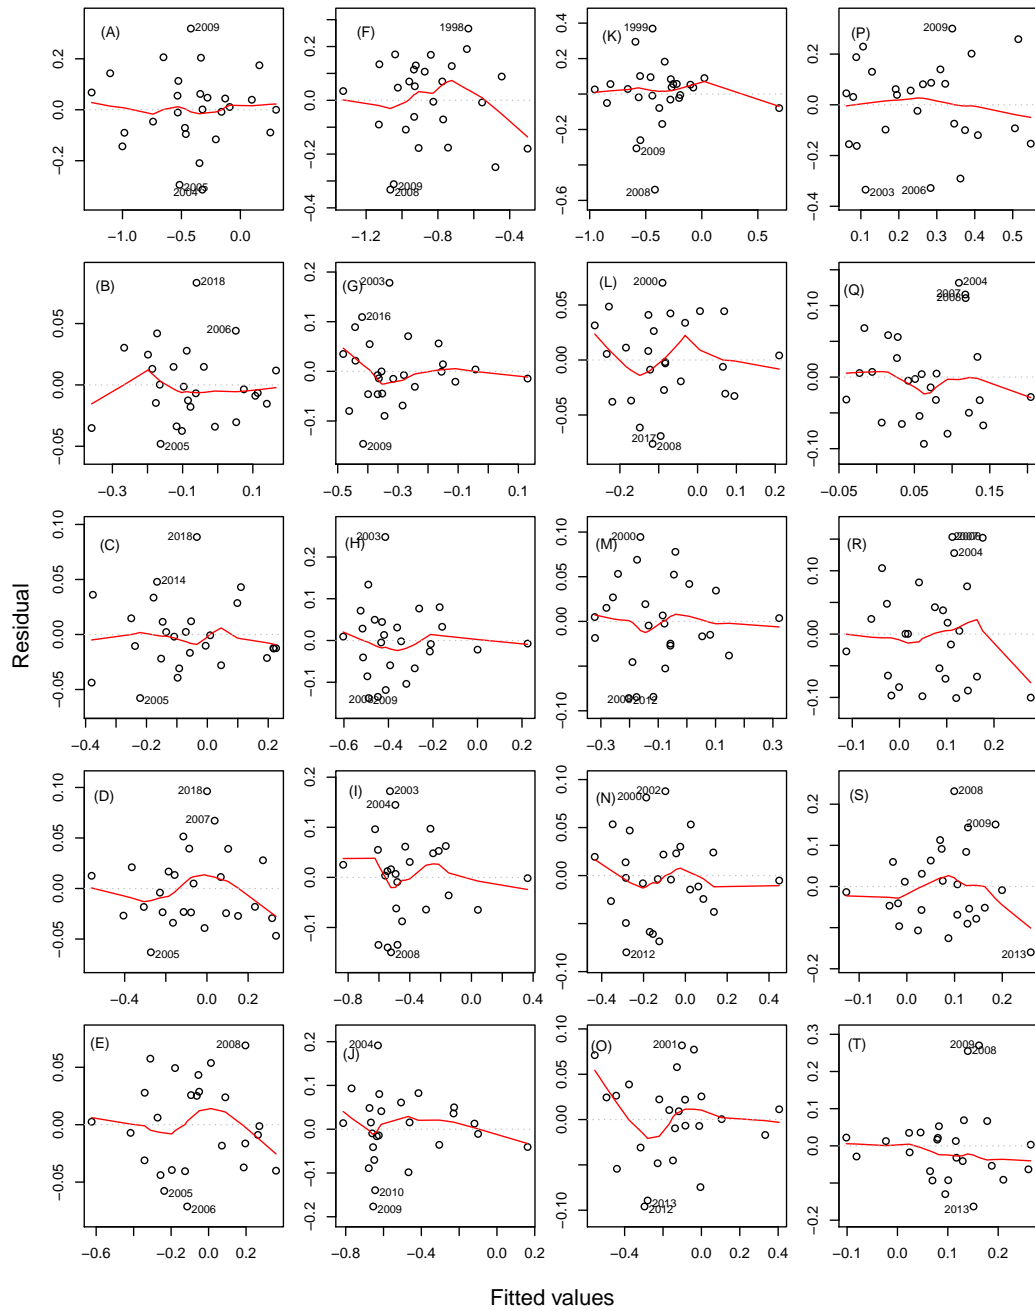

**Figure S1.** Residuals vs fitted for the linear models across different climate zones (columns from left to right: equatorial, arid, temperate, snow) and for the scPDSI and SPEI $\tau$  with different integration times (rows from top to bottom: scPDSI and SPEI $\tau$  with  $\tau \in \{03, 06, 12, 24\}$ ).

### 3 Results

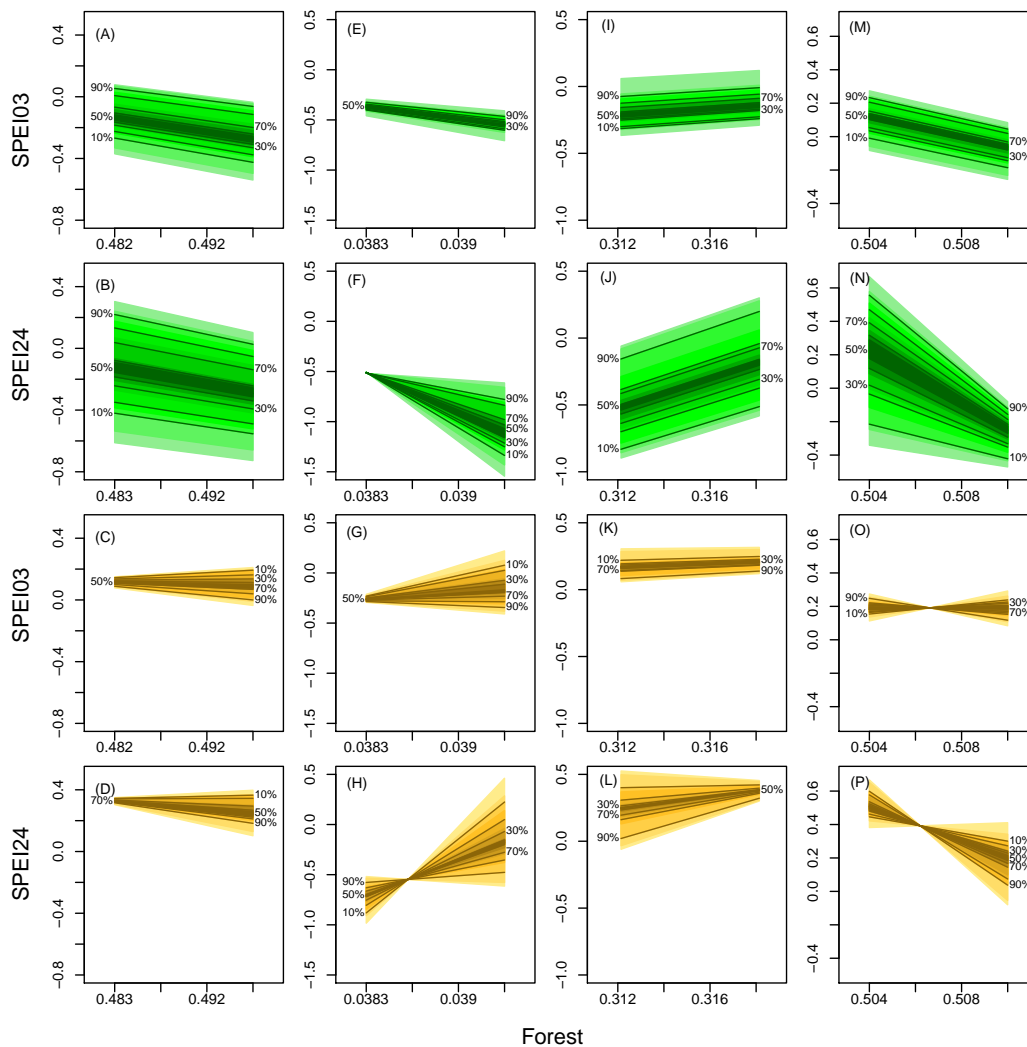

**Figure S2.** Same as Fig. 6 but for the first two rows, the temperature is held constant at its 0.99 quantiles (maximum) and for the bottom two rows, precipitation is held constant at its 0.99 quantiles (maximum).

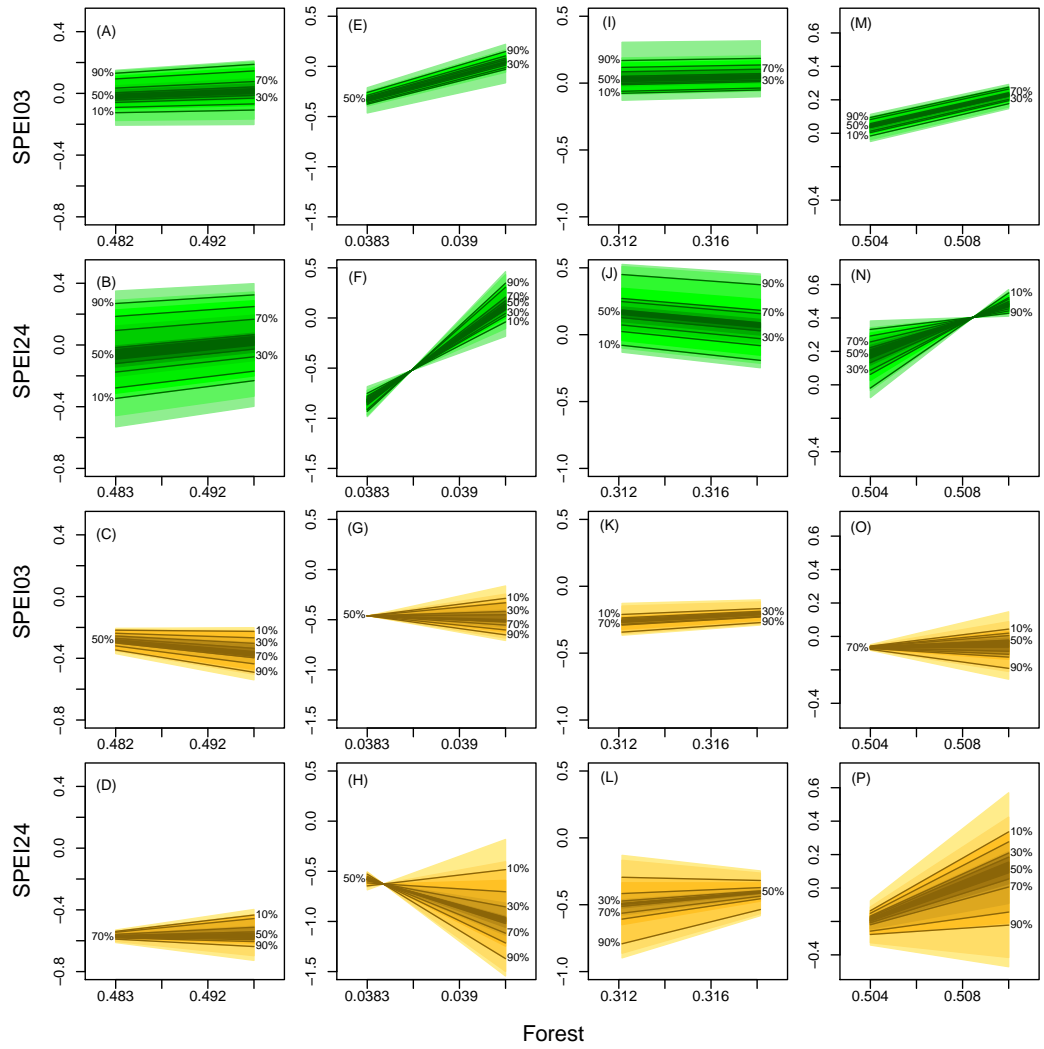

**Figure S3.** Same as Fig. 6 but for the first two rows, the temperature is held constant at its 0.01 quantiles (minimum) and for the bottom two rows, precipitation is held constant at its 0.01 quantiles (minimum).

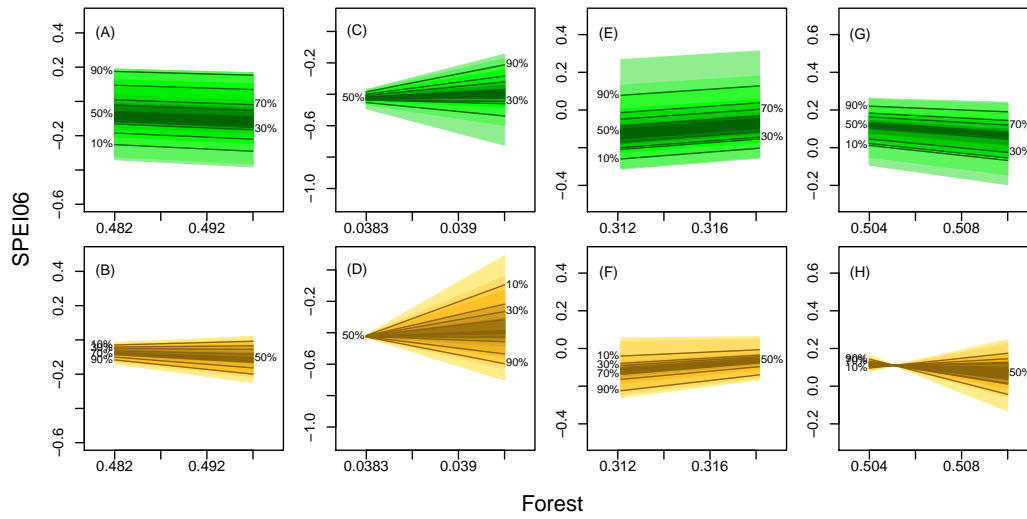

**Figure S4.** Same as Fig. 6 but for SPEI06

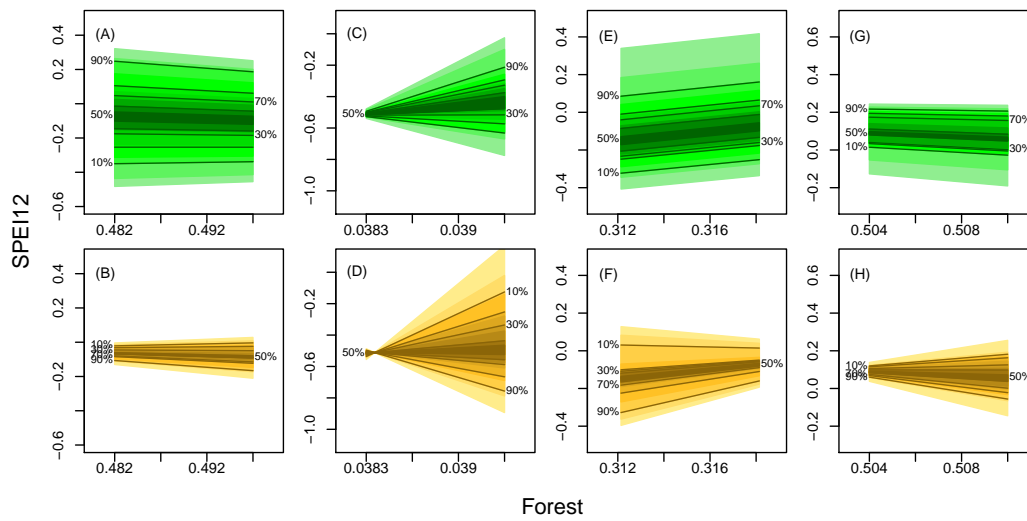

**Figure S5.** Same as Fig.6 but for SPEI12.



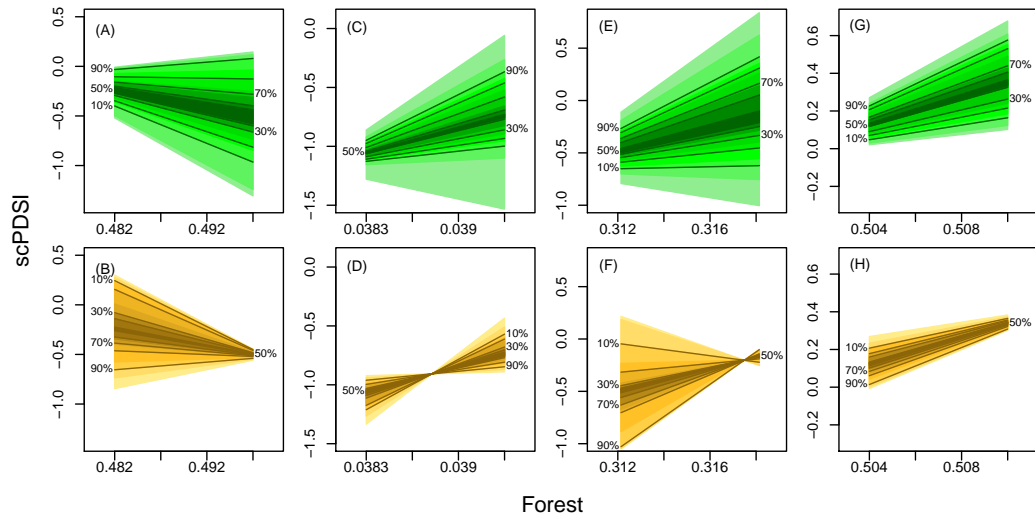

**Figure S6.** Same as Fig. 6 but for scPDSI.

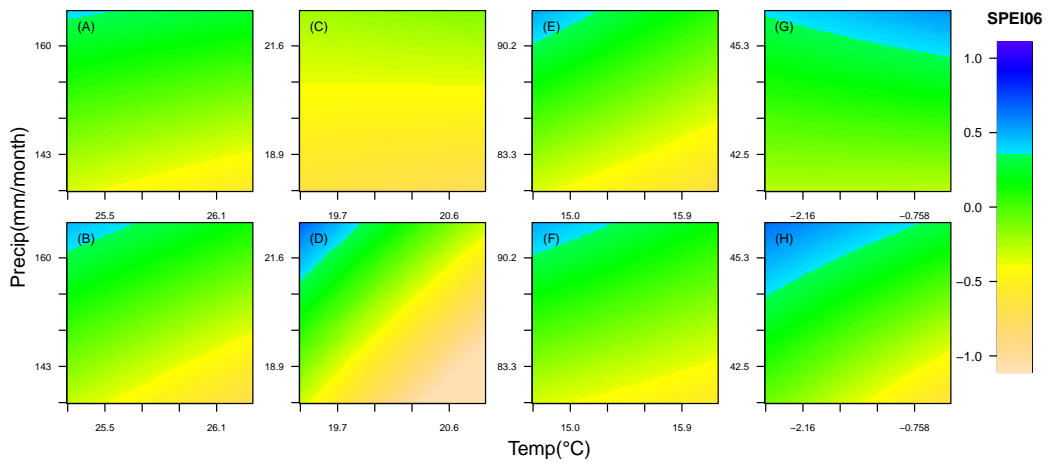

**Figure S7.** Same as Fig. 7 but for SPEI06.

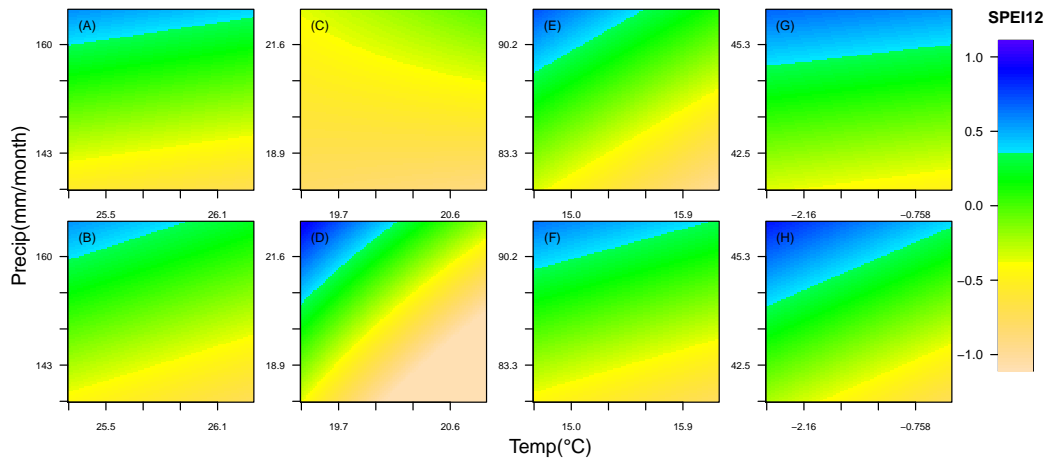

**Figure S8.** Same as Fig. 7 but for SPEI12.

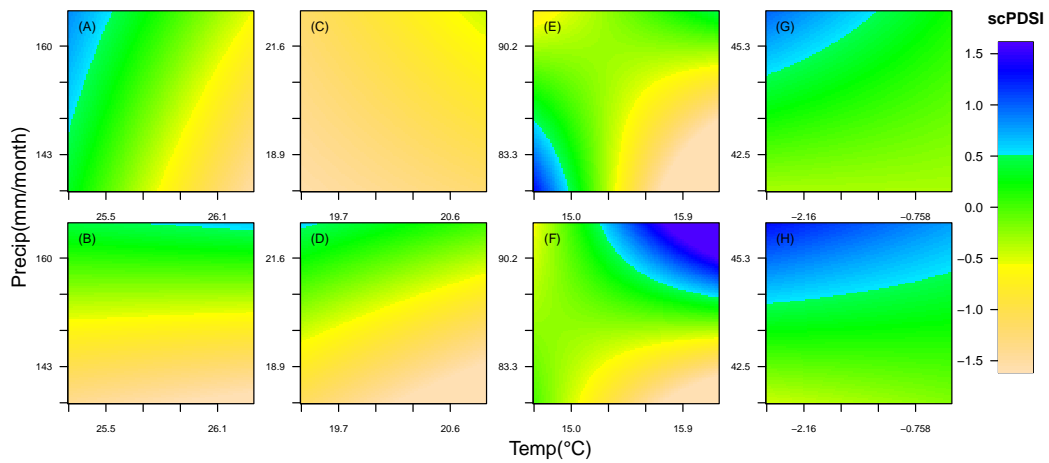

**Figure S9.** Same as Fig. 7 but for scPDSI.

## References

- 5 Barichivich, J., Osborn, T., Harris, I., van der Schrier, G., and Jones, P.: Monitoring global drought using the self-calibrating Palmer Drought Severity Index [in " State of the Climate in 2020" eds. Dunn RJH, Aldred F, Gobron N, Miller JB & Willett KM], *Bulletin of the American Meteorological Society*, 102, S68–S70, 2021.  
ESA: Land Cover CCI: Product User Guide Version 2.0, [https://maps.elie.ucl.ac.be/CCI/viewer/download/ESACCI-LC-Ph2-PUGv2\\_2.0.pdf](https://maps.elie.ucl.ac.be/CCI/viewer/download/ESACCI-LC-Ph2-PUGv2_2.0.pdf), 2017.
- 10 Harris, I., Osborn, T. J., Jones, P., and Lister, D.: Version 4 of the CRU TS monthly high-resolution gridded multivariate climate dataset, *Scientific data*, 7, 109, 2020.  
Peel, M. C., Finlayson, B. L., and McMahon, T. A.: Updated world map of the Köppen-Geiger climate classification, *Hydrology and earth system sciences*, 11, 1633–1644, 2007.  
Vicente-Serrano, S. M., Beguería, S., and López-Moreno, J. I.: A multiscalar drought index sensitive to global warming: the standardized precipitation evapotranspiration index, *Journal of climate*, 23, 1696–1718, 2010a.
- 15 Vicente-Serrano, S. M., Beguería, S., López-Moreno, J. I., Angulo, M., and El Kenawy, A.: A new global 0.5 gridded dataset (1901–2006) of a multiscalar drought index: comparison with current drought index datasets based on the Palmer Drought Severity Index, *Journal of Hydrometeorology*, 11, 1033–1043, 2010b.
